# Supplementary material
Source: PubMed Central journal article supplement (PMC5340588)

# (A) *An. gambiae*

*Inversion 2La*

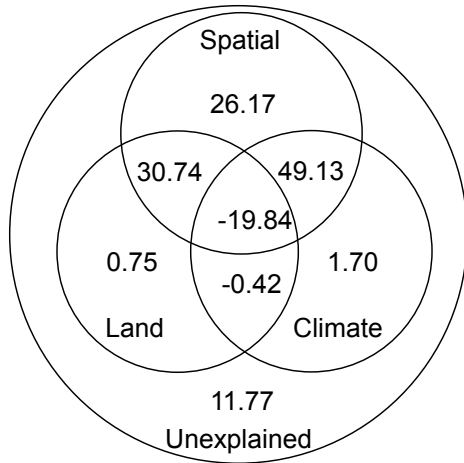

*Inversion 2Rb*

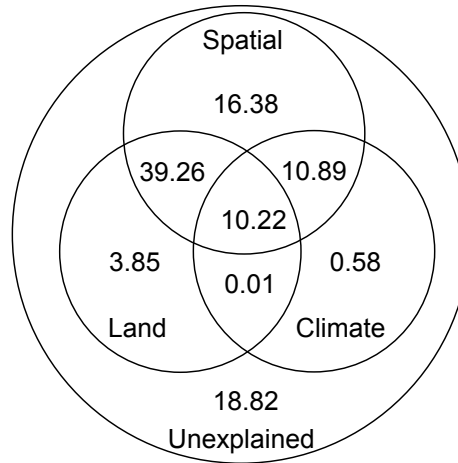

*Inversion 2Rc*

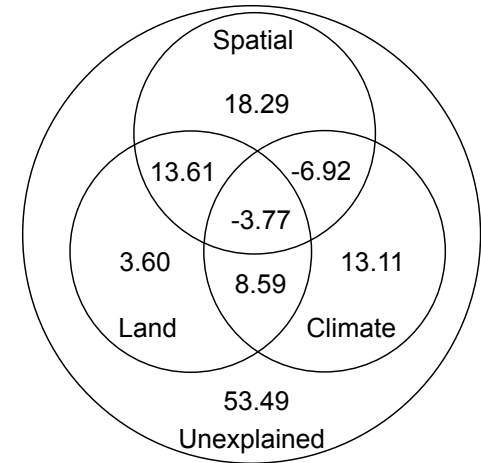

*Inversion 2Rd*

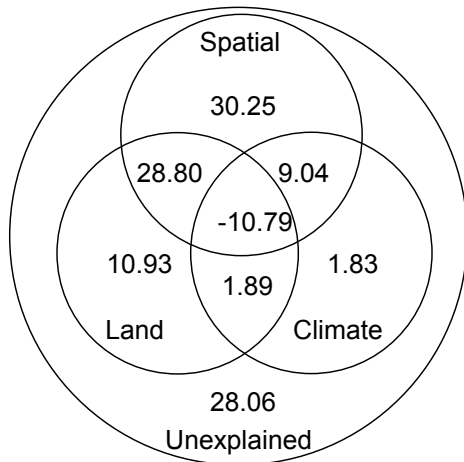

*Inversion 2Ru*

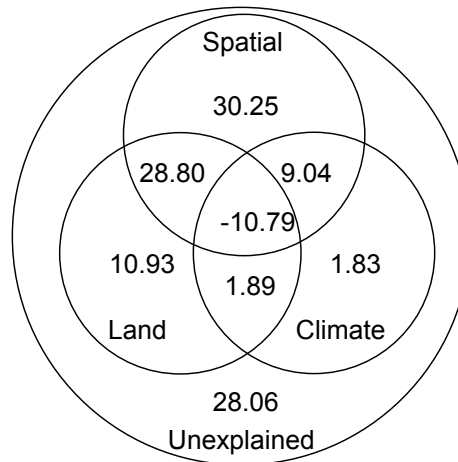

*Inversion 2Ru*

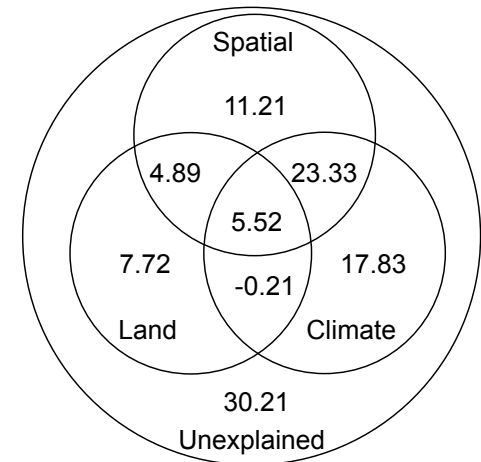

# (B) *An. coluzzii*

*Inversion 2La*

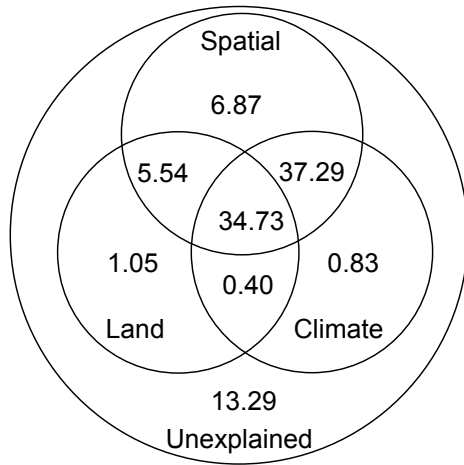

*Inversion 2Rb*

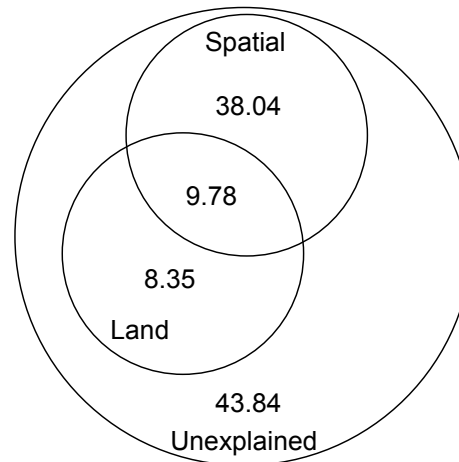

*Inversion 2Rc*

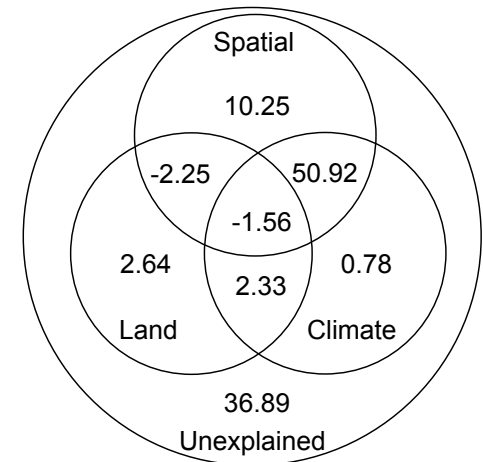

*Inversion 2Rd*

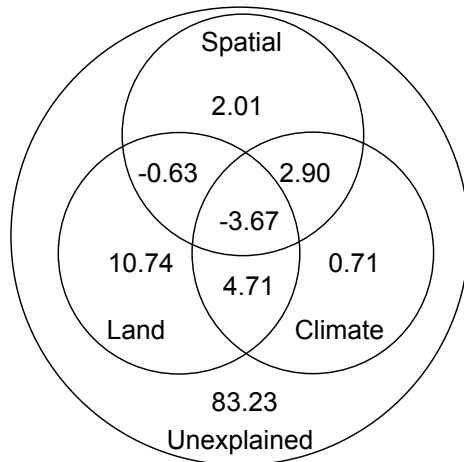

*Inversion 2Ru*

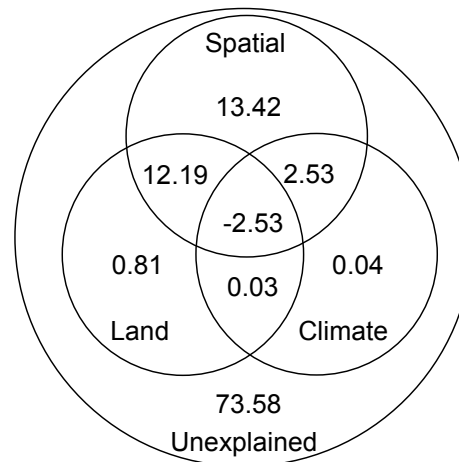

# (C) *An. arabiensis*

*Inversion 2Ra*

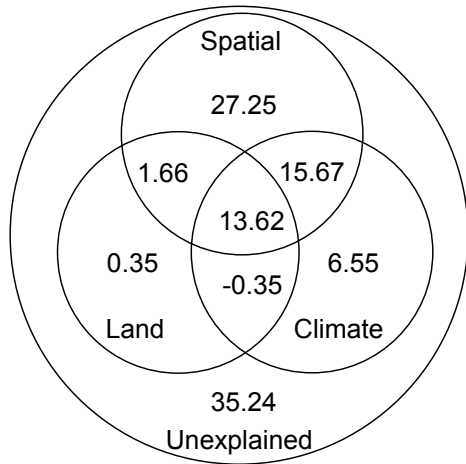

*Inversion 2Rb*

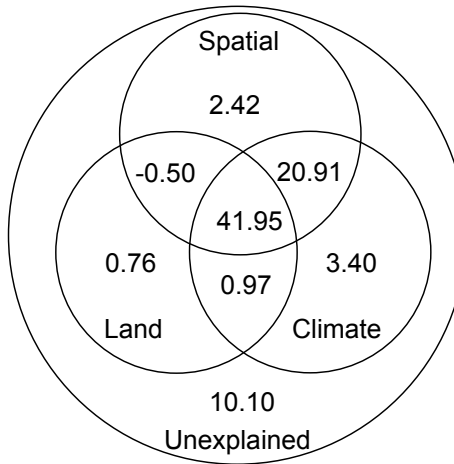

*Inversion 2Rc*

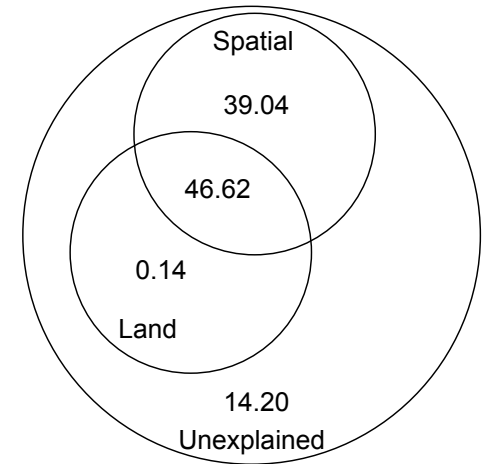

*Inversion 2Rd1*

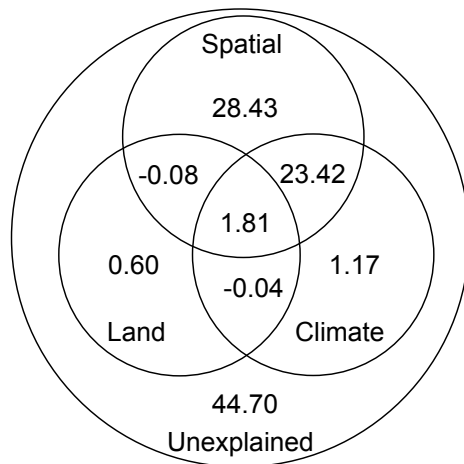

*Inversion 3Ra*

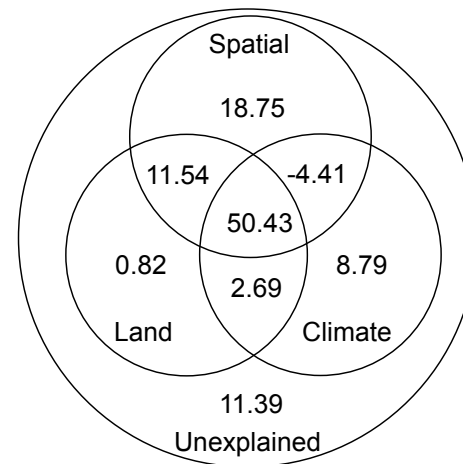

# (D) *An. funestus*

*Inversion 2Ra*

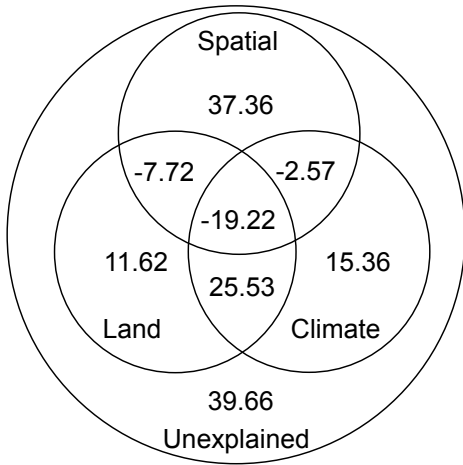

*Inversion 2Rh*

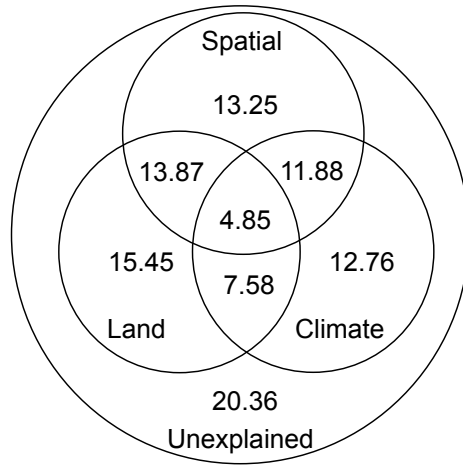

*Inversion 2Rab*

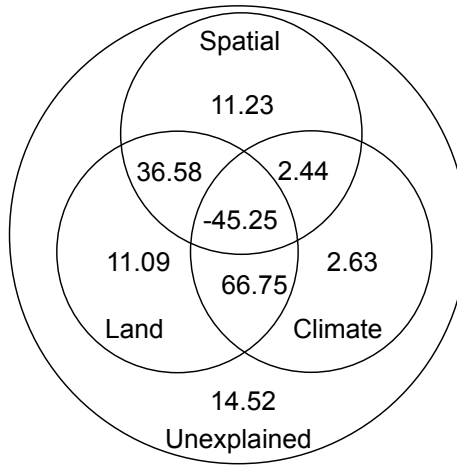

*Inversion 2Rt*

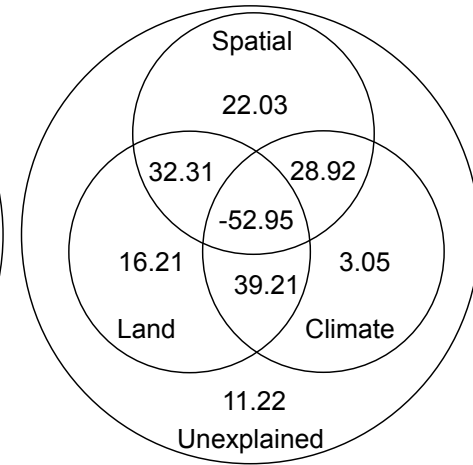

*Inversion 3Ra*

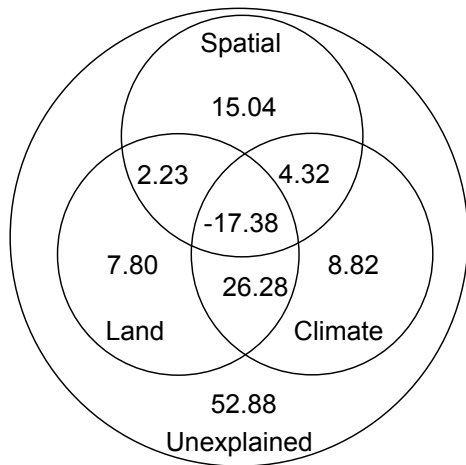

*Inversion 3Rb*

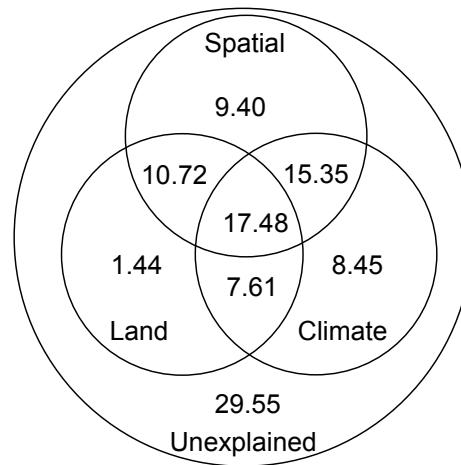

*Inversion 3La*

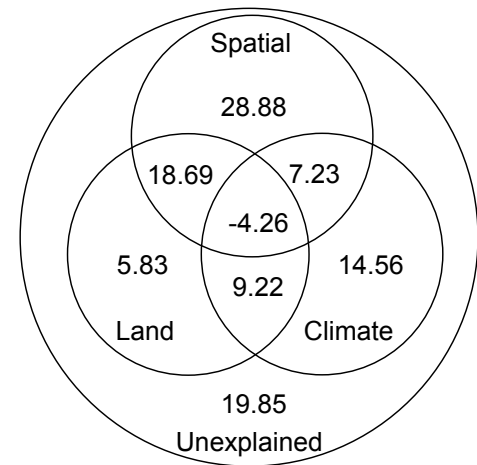

Supplement: NIHMS842021-supplement-Supp_Fig_S3.pdf [file NIHMS842021-supplement-Supp_Fig_S3.pdf]
