# Supplementary material
Source: PubMed Central journal article supplement (PMC5340588)

*Anopheles gambiae*

Figure S1

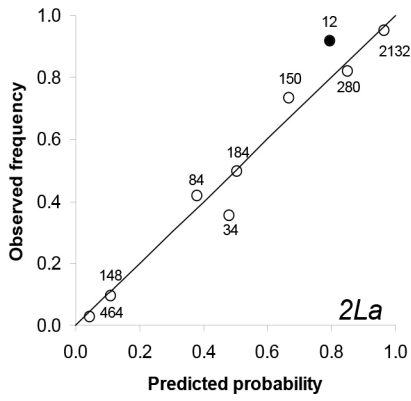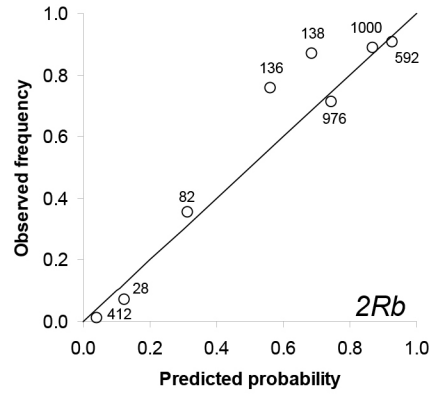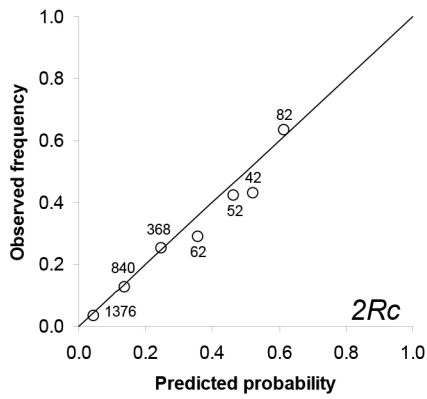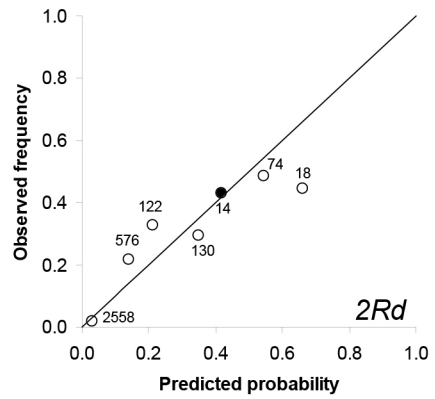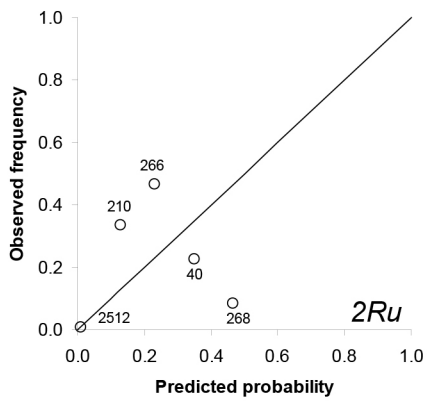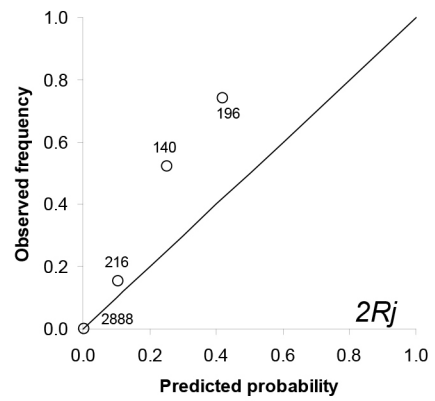

# *Anopheles coluzzii*

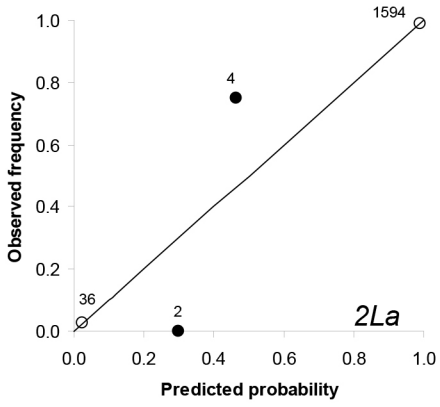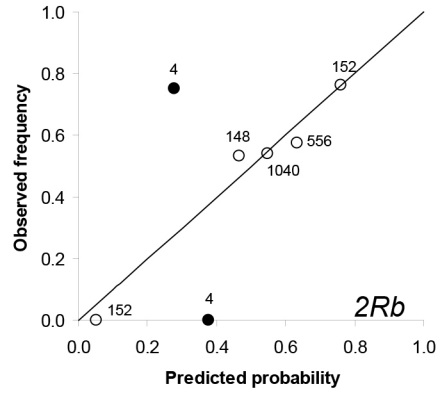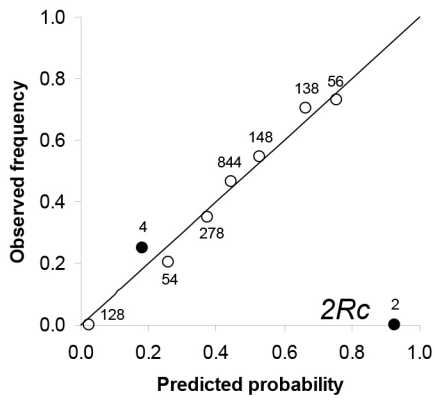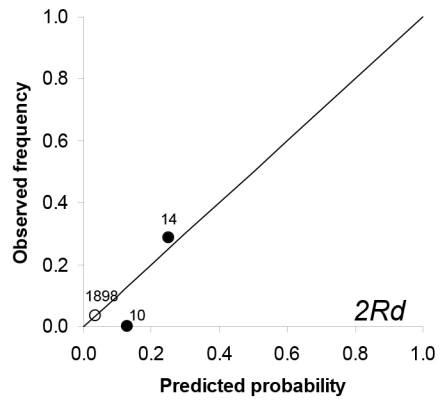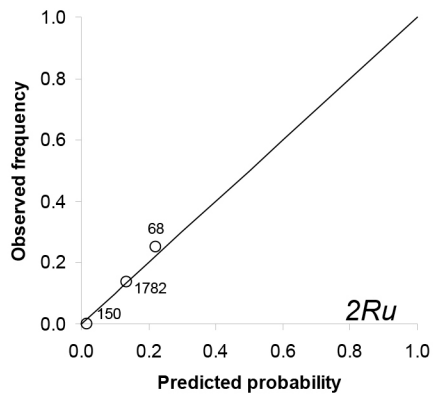

# *Anopheles arabiensis*

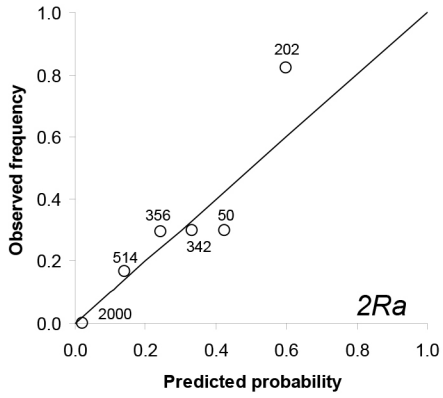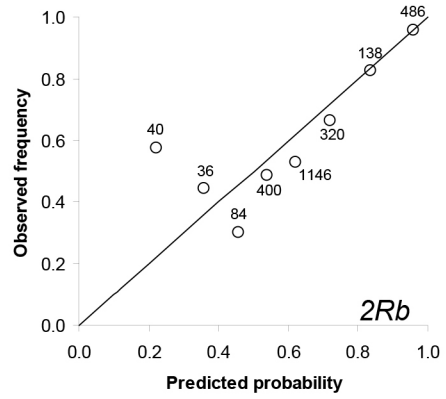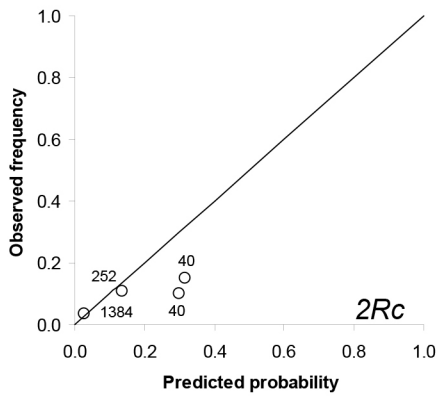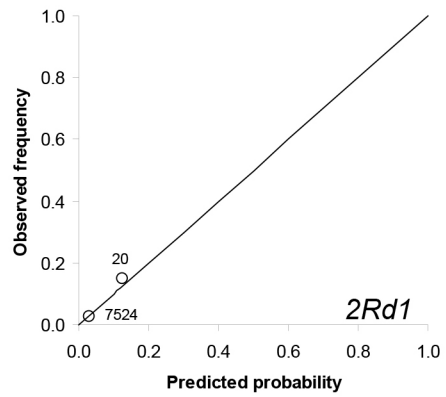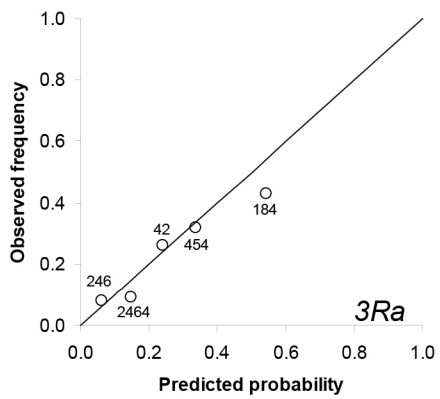

# Anopheles funestus

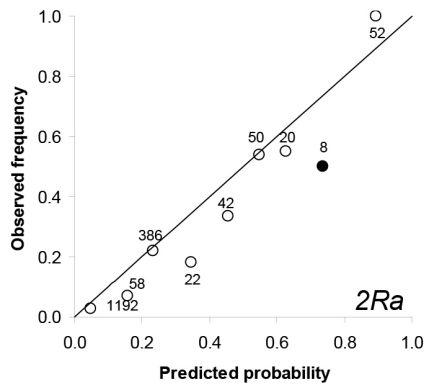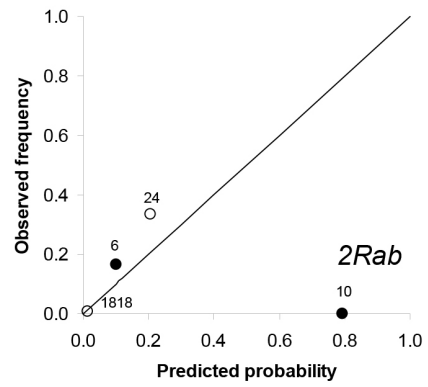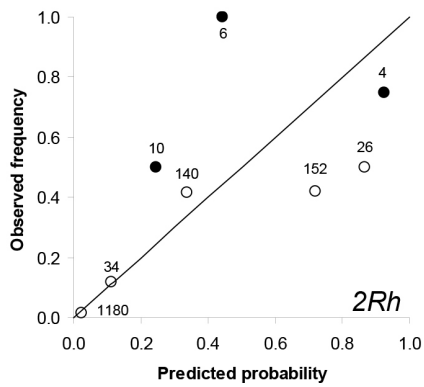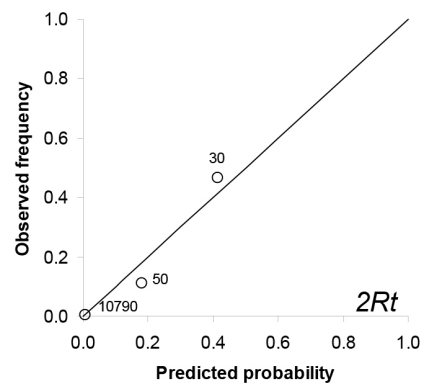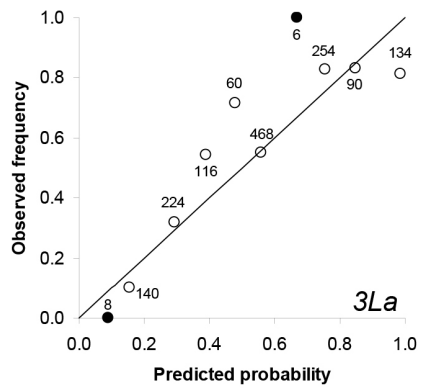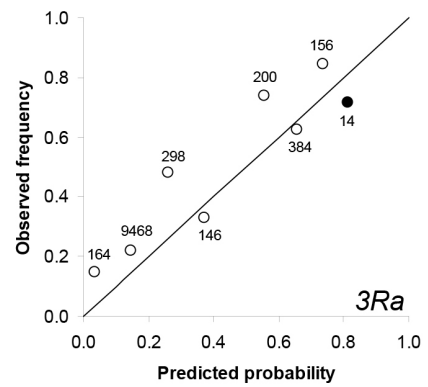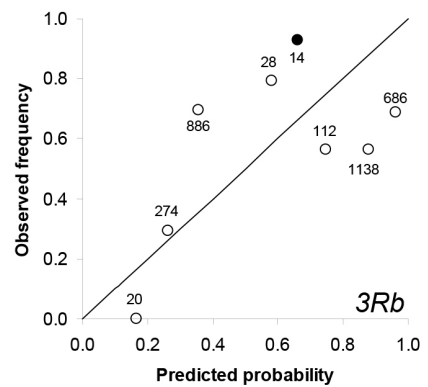

Supplement: NIHMS842021-supplement-Supp_Fig_S1.pdf [file NIHMS842021-supplement-Supp_Fig_S1.pdf]

**A**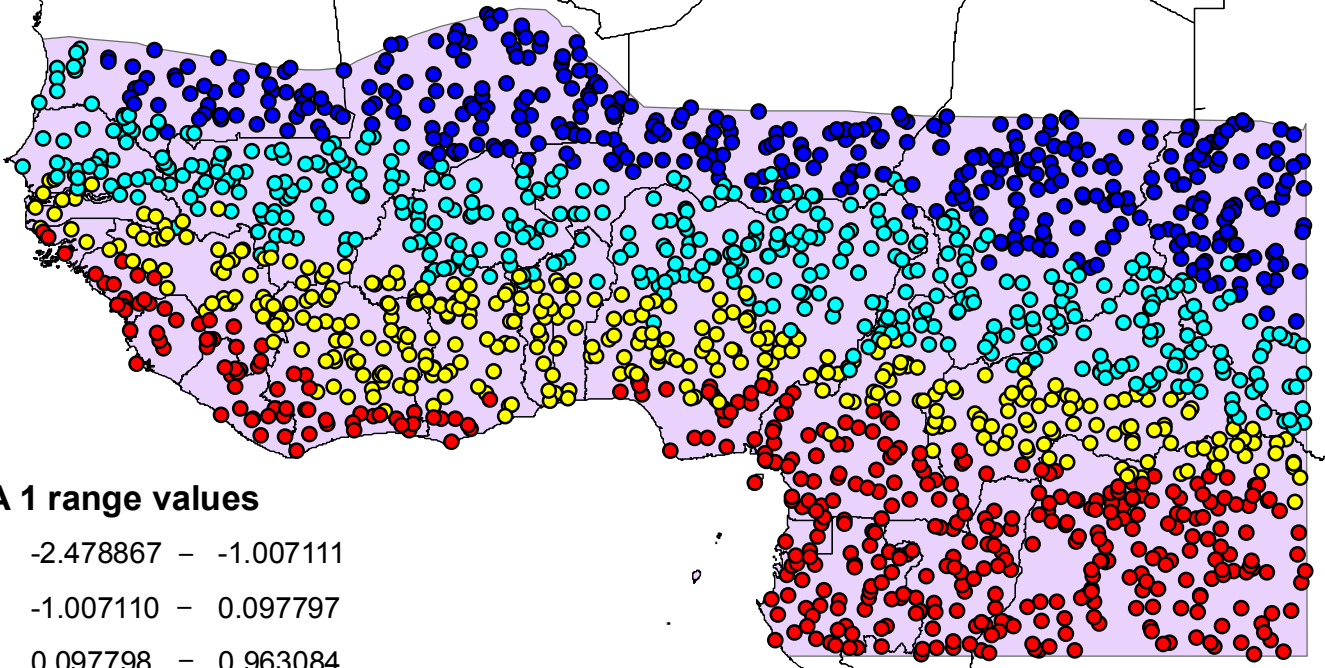**CCA 1 range values**

- -2.478867 - -1.007111
- -1.007110 - 0.097797
- 0.097798 - 0.963084
- 0.963085 - 1.705758

**B**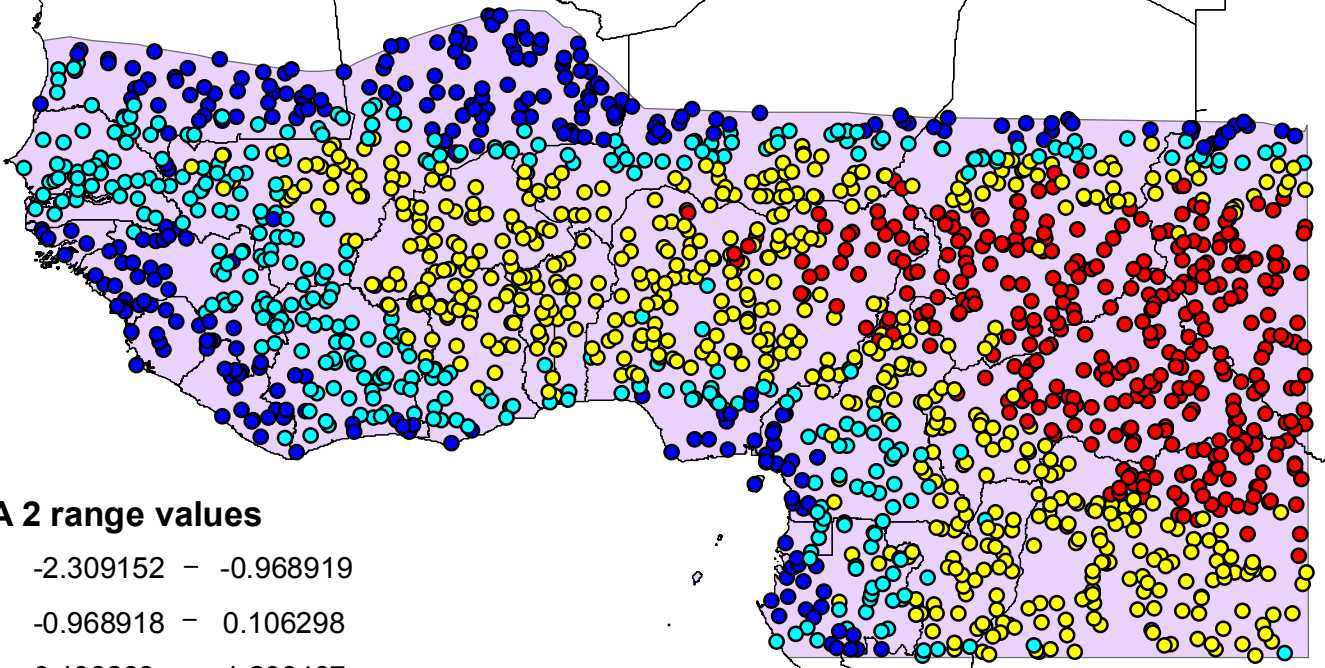**CCA 2 range values**

- -2.309152 - -0.968919
- -0.968918 - 0.106298
- 0.106299 - 1.206407
- 1.206408 - 4.979707

**Figure S2**

Supplement: NIHMS842021-supplement-Supp_Fig_S2.pdf [file NIHMS842021-supplement-Supp_Fig_S2.pdf]
